# Supplementary material for: Time to Spread Your Wings: A Review of the Avian Ancient DNA Field
Source: Genes (Basel). 2017 Jul 18;8(7):184. doi: 10.3390/genes8070184 (PMC5541317; doi:10.3390/genes8070184)
Supplement: Supplementary file 1 [file genes-08-00184-s001.xlsx]

## Sheet: Sheet1
Table S1 Summary of avian aDNA studies that extracted DNA from Holocene or Pleistocene fossils, artifacts, or sediment, as well as museum specimens of extinct birds. Studies marked with an asterix did not contain the terms "avian", "bird", "ancient DNA", or "aDNA" in either their title or keywords. References are recorded below.
Topic	Reference	Key words	Taxon	Common name	Extinction	Location	Age	Substrate	Loci	Methods	Length (bp)	Accession
aDNA preservation, archaeology, novel substrate, palaeognath	Oskam et al. 2011*	Ancient DNA, fossil eggshell, moa, archaeology, midden	Emeus, Euryapteryx, Dinornis	Moa	ca. 13th C	New Zealand	Holocene	Eggshell	Mt, Nu	Microsatellite typing, PCR, sequencing?	200	JF927651-JF927706
aDNA preservation, identification, palaeognath, past biodiversity	Allentoft et al. 2012a	Moa, ancient DNA, Dinornithiformes, fossil deposit DNA preservation, extinct megafauna	Dinornithiformes, Aptornis defossor	Moa, Adzebill	ca. 13th C	New Zealand	Holocene (1482-7839 ybp)	Bone	Mt	PCR, Sanger sequencing	89-376	JF357912-23, JF357911
aDNA preservation, methods, novel substrate, past biodiversity	Grealy et al. 2015	aDNA, ancient DNA, archaeology, biodiversity, bulk bone, experimental error, fossil, metabarcoding, next-generation sequenicng, palaeontology	Dinornithidae, Emeidae, Apterygidae, Strigopidae, Aptornithidiae, Anatidae, Rallidae, Accipitridae	Moa, kiwi, kakapo, adzebill, duck, rails, hawks	Various	New Zealand	Holocene (1400-1600 ybp)	Bulk bone	Mt	Metabarcoding, NGS (Illumina), PCR	232	NA
	Grealy et al. 2016	Ancient DNA, bulk bone metabarcoding, DNA preservation, Naracoorte Caves, palaeontology	Rhipidura, Phaps, Cracticus	Fantail, Common bronzewing, Australian Magpie	Various	Australia	Holocene (906-10366 ybp)	Bulk bone	Mt	Metabarcoding, NGS (Illumina), PCR, Shotgun	103	NA
	Murray et al. 2013	Palaeontology, archaeology, biodiversity	Acanthizidae, Anatidae, Cardinalidae, Corvidae, Dasyornithidae, Diomedeidae, Meliphagidae, Phalacrocoracidae, Psittaculidae, Timaliidae, Anas, Cygnus, Dasyornis, Phylidonyris, Phalacocorax		Various	Australia	Holocene, Pleistocene (ca. 4,000-45,000 ya)	Bulk bone	Mt	Metabarcoding, NGS (Illumina), PCR
aDNA preservation, palaeognath	Allentoft et al. 2012b	DNA degradation, aDNA, decay kinetics, DNA half-life	Dinornithiformes	Moa	ca. 13th C	New Zealand	Holocene	Bone	Mt, Nu	NGS (Illumina), qPCR, shotgun
Archaeology, domestication, phylogeography	Thomson et al. 2014	Lapita, Pacific colonization, phylogeography, archaeology, migration	Gallus gallus	Chicken	Not extinct	Easter Island, Hawaii, Niue, Fais, Peru	Holocene	Bone	Mt	Cloning, PCR, NGS
	Xiang et al. 2014	ancient DNA, chicken, domestication, species origin	Gallus gallus (domesticus and gallus), Gallus varius, Gallus soneratii, Gallus lafayetii	Chicken	Not extinct	China	Holocene (350-10,000 ya)	Bone	Mt	PCR, Sanger sequencing	159-326
Archaeology, extinction	Waters et al. 2017		Megadyptes spp.	Penguins	Some extinct	New Zealand	Holocene 1920 BC-1900 AD	Previously published		Previously published
Archaeology, novel substrate, palaeognath	Oskam et al. 2012	Ancient DNA, fossil eggshell, moa, archaeology, faunal extinction, megafauna, midden, human burial	Anomalopteryx didiformis, Dinornis robustus, Emeus crassus, Euryapteryx curtus	Moa	ca. 13th C	New Zealand	Holocene	Eggshell, bone	Mt, Nu	PCR, Sanger sequencing, sex typing	157-376	JF927651-JF927706, JX271058-JX271274
	Jacomb et al. 2014	Radiocarbon, ancient DNA, colonization, Maori, Bayesian	Dinornis robustus, Emeus crassus, Euryapteryx curtus	Moa	ca. 13th C	New Zealand	Holocene	Eggshell	Mt, Nu	Microsattelite typing, PCR, sequencing?
Archaeology, identification, novel substrate, palaeognath	Hartnup et al. 2009	Maori cloaks, species identification, ancient DNA	Dromaius	Emu	Not extinct	New Zealand	Holocene	Feathers	Mt	PCR, Sanger seqeunicng
	Hartnup et al. 2011	Molecular anthropology, ancient DNA, kiwi, molecular sexing, mitochondrial DNA	Apteryx sp.	Kiwi	Not extinct	New Zealand	Holocene	Feathers	Mt, Nu	PCR, Sanger sequencing, sex typing
Archaeology, identification	Eda et al. 2016	Northeast Asia, prehistoric hunter-gatherer, Maritime adaptation, aDNA analysis, medullary bone, Phoebastria albatrosses	Phoebastria spp.	Albatrosses	Not extinct	Japan	Holocene (1000-3800 ybp)	Bone	Mt	PCR, Sanger seqeunicng
	Eda et al. 2006	Species identification, ancient DNA, short-tailed albatross, microevolution, north Pacific, avian bone, zooarchaeology	Phoebastria spp.	Albatrosses	Not extinct	Japan	Holocene	Bone	Mt	PCR, Sanger seqeunicng	143
	Barnes et al. 1998	Ancient DNA, anser, Branta, geese, mitochondrial DNA, polymerase chain reaction	Branta	Goose	Not extinct	UK	Holocene (17th-19th C)	Bone	Mt	PCR, Sanger seqeunicng	192
Archaeology, population structure	Eda et al. 2012	Ancient DNA, archaeological materials, Phoebastria albatrus, population structure, stable isotope analysis, short-tailed albatross	Phoebastria albatrus	Short-tailed albatross	Not extinct	Japan	Holocene	Bone	Mt	PCR, Sanger seqeunicng		AB551841-AB551868
Behaviour, palaeognath	Huynen et al. 2010	Avian eggs, exogenous DNA, endogenous DNA, ratite, evolution	Anomalopteryx didiformis, Euryapteryx, Dinornis novaezealandiae, Pachyornis elephantopus, Dinornis robustus	Little bush moa	ca. 13th C	New Zealand	Holocene	Eggshell	Mt	PCR, Sanger sequencing, sex typing	120-156
Biogeography, divergence time, evolution,phylogeny	Warren et al. 2006	Diversification, extinction, immigration, Indian Ocean islands, molecular phylogeny, Zosterops	Zosterops semiflavus	White-eyes	late 1800s	Seychelles	Holocene	Museum skin	Mt	PCR, Sanger sequencing	311-351	DQ328345, DQ328445
	Kirchman 2012*	Flightless birds, Gallirallus, Oceania, parallel evolution, Rallidae, speciation	Gallirallus pendiculentus, Gallirallus wakensis, Gallirallus ripleyi, Tricholimnas lafresnayanus, Cabalus modestus +	Rails	?	Mariana Islands, Wake Island, Cook Islands	Holocene	Bone, Toe pad	Mt	PCR, Sanger sequencing	154-535	JQ360478, JQ360499, JQ348014, FJ207357, JQ360500, JQ348013, FJ207352, JQ360488, JQ347669, FJ207347, JQ360473, JQ347991, JQ360455, JQ360475, JQ347992, FJ207351, JQ360474, JQ347993, FJ207351
	Garcia-R et al. 2014	Adaptation, biogeography, convergence, ecology, phylogeny, radiation, Rallidae, taxonomy	Diaphorapteryx hawkinsi, Gallirallus lafresnayanus, G. dieffenbachii	Hawkin's rail, New Caledonian rail, Dieffenbach's rail	Late 19th C, 1890?, 1840	Chatham Islands, New Caledonia	Holocene	Toe pads, bones	Mt, Nu	PCR, Sanger sequencing	505-905	KC614124, KC614130, KC614127
	Garcia-R and Trewick 2015*	Biogeography, dispersal, phylogeny, speciation	Porphyrio albus	Purple swamphens	ca. 1834	Lord Howe Island	Holocene	Museum tissue	Mt, Nu	PCR, Sanger sequencing
Biogeography, divergence time, novel substrate, palaeognath, phylogeny	Grealy et al. 2017	Ancient DNA, biogeography, eggshell, high-throughput sequencing, palaeognath, phylogeny	Aepyornis spp.	Elephant bird	1000 ybp	Madagascar	Holocene	Eggshell	Full Mt, Nu	Capture, NGS (Illumina), shotgun	16668 Mt 12000 Nu	KY412176
Biogeography, divergence time, palaeoecology, phylogeny, taxonomy	Mitchell et al. 2014	Anas, ancient DNA, Chatham Islands, ducks, extinct, fossil	Pachyanas chathamica	Chatham duck	ca. 13-15th C	Chatham Islands, New Zealand	Holocene	Bone	Full Mt	Capture, NGS (Ion Torrent), shotgun	15559	KF562761
	Bunce et al. 2009	Ancient DNA, Oligocene drowning, Dinornithiformes, phylogeny, taxonomy	Dinornithiformes	Moa	ca. 13th C	New Zealand	Holocene	Bone	Mt	Cloning, PCR, Sanger sequencing	389
Biogeography, divergence time, phylogeny	Bunce et al. 2005		Harpagornis moorei	Haast's eagle	ca. 13th C	New Zealand	Holocene	Bone	Mt	PCR, Sanger sequencing	1017	AY754046-7
	Shepherd and Lambert 2007*	Callaeatidae, huia, Heteralocha, Kokako, Callaeas, Saddleback, Philesturnus, Passerine phylogeny, Gondwana	Heteralocha acutirostris	Huia	1907	New Zealand	Holocene	Foot pad	Mt, Nu	PCR, Sanger sequencing	384-869	DQ469293–DQ469309
	Nylander et al. 2008*		Turdus poliocephalus poliocephalus	Norfold thrush	1970s	Norfolk Island	Holocene	?	Mt, Nu	?	671-972	EU154663, EU154774, EU154889
	Cibois et al. 2008	Island biogeography, mtDNA, phylogeny, Polynesia, reed warblers	Acrocephalus caffer musae ,A. c. longirostris, A. c. garretti	Reed warblers	20th C	Tahiti, Moorea, Raiatea, Huahine (Society Islands)	Holoene	Museum tissue	Mt	PCR, Sanger sequencing	171-879	EU303305-10, HQ844302-6
	Illera et al. 2008*	Biogeography, cryptic speciation, phylogeny, Saxicola	Saxicola dacotiae murielae	Stonechats	20th C	Spain	Holocene	Toe pad	Mt	PCR, Sanger sequencing	364	EU421079
	Johnson et al. 2010	Ectopistes migratorius, molecular systematics, ancient DNA, Columbiformes, doves	Ectopistes migratorius	Passenger pigeon	1914	USA	Holocene	Museum skin	Mt, Nu	PCR, Sanger sequencing	299	HM195099–HM195100
	Goldberg et al. 2011*	Chatham Islands, dispersal, Hemiphaga, mitochondrial DNA, New Zealand, Norfolk Island, population structure, phylogeography	Hemiphaga novaeseelandiae spadicea	Norfolk island subspecies	1800s	Norfolk Island	Holocene	Toe pad	Mt	PCR, Sanger sequencing	737-935	GQ912599-600, GQ912607, GQ912618
	Cibois et al. 2011*	Acrocephalidae, Acrocephalus, back-colonization, colonization patterns, island biogeography, Micronesia, Pacific Ocean islands, phylogeny, Polynesia, reed-warblers	Acrocephalus longirostris, A. m. musae, A. m. garretti	Mo'orea reed-warbler	1987?	Society Islands	Holocene	Toe pad	Mt	PCR, Sanger sequencing	737-935	HQ844270–HQ844429
	Kundu et al. 2012	Phylogeography, speciation, adaptive radiation, extinction, Psittaciformes	Mascarinus mascarinus, Psittacula wardi	Mascarene parrot, Seychelles parakeet	1834, 1893	Seychelles	Holocene	Foot pad	Mt	PCR, Sanger sequencing	718-740	GQ996500, GQ996499
	Cibois et al. 2012*	Charadriiformes, island biogeography, molecular phylogeny, Polynesia, Scolopacidae	Prosobonia leucoptera	Tahiti sandpiper	18th C	Society Islands	Holocene	Toe pad	Mt, Nu	PCR, Sanger sequencing	291-752	JQ012743-4
	Fabre et al. 2014*	Colonization, community assembly, Indo-Pacific, island biogeography, island evolution, Monarchidae, Myiagra, priority effects, speciation, trait evolution	Myiagra freycineti	Monarch flycatchers	1983	Guam	Holocene	Museum tissue	Mt	PCR, Sanger sequencing	170-1014	KF281087,KF281025
	Cibois et al. 2014*	Island biogeography, molecular phylogeny, New Guinea, Pacific ocean, Polynesia, Ptilinopus	Ptilinopus mercierii	Fruit doves	1922	Marquesas	Holocene	Museum tissue	Mt	PCR, Sanger sequencing	319-877	KF446766, KF446799, KF446753
	Andersen et al. 2015*	Island biogeography, diversification rates, divergence time estimation, great speciators, Todiramphus chloris	Todiramphus cinnamominus cinnamominus	Guam kingfisher	1986	Guam, Mariana Islands	Holocene	Museum tissue	Mt, Nu	PCR, Sanger sequencing	351-1041	KP291436,KP291296
	Gibb et al. 2015*	Passeriformes, mitochondrial genomes, oscine biogeography	Turnagra capensis	Piopio	1905	New Zealand	Holocene	Toe pad	Full Mt	NGS (Illumina), Shotgun	16994	KT894672
	Marki et al. 2017	Meliphagides, molecular phylogeny, systematics, Australia, New Guinea, honeyeaters	Gerygone insularis, Anthornis melanocephala	Lord Howe Island Gerygone, Chatham bellbird	1928, 1906	Lord Howe Island, Chatham Island	Holocene	Toe pad	Mt	PCR and SEE SUPP INFO	814-1041	KY230300, KY230340
Biogeography, divergence time, phylogeny, taxonomy	Scofield et al. 2017	New Zealand raven, Corvus, ancient DNA, mitogenome, phylogeny, osteology	Corvus antipodum, C. moriorum	Ravens	ca. 16th C	Chatham Islands, New Zealand	Holocene	Bone	Full Mt	NGS (Illumina), Shotgun	15065-15593	KX822154, KX822153
	Zuccon et al. 2008*		Fregilupus varius	Hoopoe starling	1850s	Reunion	Holocene	Museum skins	Mt	PCR, Sanger sequencing	684-875	EU551952, EU551999
	Mitchell et al. 2016	Ancient DNA, Passeriformes, Acanthisttidae, biogeography, mitogenomics	Pachyplichas yaldwyni, Traversia lyalli, Xenicus longipes	Lyall's wren, SI stout-legged wren, Bush wren	?, ca. 1900, late 19th C	New Zealand	Holocene	Bone	Full Mt	Capture,NGS (Illumina), shotgun	15405-15586	KX369036, KX369034, KX369035
Biogeography, palaeognath, phylogeny	Cooper et al. 1992*		Anomalopteryx didiformis, Pachyornis elephantopus, Dinornis novaezelandiae, Megalapteryx didinus, Emeus crassus	Moa	ca. 13th C	New Zealand	Holocene	Bones, soft tissue	Mt	PCR, Sanger sequencing	400
Biogeography, past genetic diversity, phylogeography	Austin et al. 2013	Amytornis grasswren, Australian arid zone, phylogeography, extinction biogeography	Amytornis modestus modestus, Amytornis modestus inexpectatus, Amytornis textilis macrourus, A. textilis carteri, A. textilis giganturus	Grasswrens	Late 1800s	Australia	Holocene	Museum tissue	Mt	PCR, Sanger sequencing	864-1016	KF053457-64, KF053528-9, KF053514-5, KF053527,KF053520-4, KF053516-8
Biogeography, phylogeny	Christidis et al. 1996*		Turnagra capensis	South Island Piopio	1908	New Zealand	Holocene	Museum skin	Mt	PCR, Sanger sequencing	924	TCU51734
	Powell et al. 2008	Biogeography, blackbirds, grackles, paraphyly, Quiscalus, species limits, systematics	Quiscalus palustris	Slender-billed grackle	1890	Mexico	Holocene (1904)	Toe pad	Mt	PCR, Sanger sequencing	1251	FJ389557
	Trewick 1997*		Fulica chathamensis, Porphyrio mantelli	Giant coot, South Island Takahe, North Island Takahe	?, 1894	New Zealand	Holocene	Bone	Mt	PCR, Sanger sequencing	384-385	FCU77147, PMU77144
Biogeogrpahy, divergence time, evolution, palaeognath, phylogeny	Haddrath and Baker 2001	Phylogeny, mitochondrial DNA, palaeognath, ratites, moa	Anomalopteryx didiformis, Emeus crassus	Moa	ca. 13th C	New Zealand	Holocene	Bone	Full Mt	PCR, Sanger sequencing
	Phillips et al. 2010*		Dinornithiformes	Moa	ca. 13th C	New Zealand	Holocene			Reanalysis
	Haddrath and Baker 2012*	Vicariance biogeography, palaeognath, phylogenetics, retroposon, bird origins, gene trees	Dinornithiformes	Moa	ca. 13th C	New Zealand	Holocene	Bone	Nu	PCR, sequencing?
	Smith et al. 2013*			Moa	ca. 13th C	New Zealand			Nu	PCR, reanalysis, Sanger sequencing
	Baker et al. 2014	Phylogenomics, ratite paraphyly, CR1 retroposon insertions, little bush moa, ancient DNA, morphological convergence	Anomalopteryx didiformis	Little bush moa	ca. 13th C	New Zealand	Holocene	Bone	Nu	NGS (454), retroelements, Sanger sequencing	1133474	AF338714, AF338712
	Mitchell et al. 2014		Aepyornis hildebrandti, Mullerornis agilis	Elephant bird	1000 ybp	Madagascar	Holocene	Bone	Full Mt	Capture, NGS (Illumina), shotgun	15547-15731	KJ749824, KJ749825
	Yonezawa et al. 2016		Aepyornis maximus, Mullerornis sp.	Elephant bird	1000 ybp	Madagascar	Holocene	Bone	Full Mt, Nu	NGS (Illumina), shotgun	73716 Nu 15381 Mt	AP014697, AP014698
	Cooper et al. 2001		Emeus crassus, Dinornis giganteus	Moa	ca. 13th C	New Zealand	Holocene	Bone	Full Mt	Cloning, PCR, Sanger sequencing	10767?
Biogeogrpahy, evolution, phylogeny	Sorenson et al. 1999	Anseriformes, Anatidae, molecular systematics, mitochondrial DNA, fossils, ducks	Thambetochen chauliodous, Ptaiochen pau	Moa-nalos	ca. 1000 AD	Hawaii	Holocene	Bone	Mt	PCR, Sanger sequencing	95-389	AF173697,AF173732, AF173758,AF173787,AF173815
Conservation, divergence time, evolution, extinction, phylogeny, taxonomy	Cibois et al. 2004	Cytochrome b, extinction, Marquesas islands, molecular phylogeny, monarchs, Pomarea	Pomarea pomarea, P. iphis fluxa, P. m. mendozae, P. mendozae mira, P. mendozae nukuhivae	Maupiti monarch, Marquesas monarch	1830s-1985	Cook Islands, Marquesas Islands	Holocene	Museum skin	Mt	PCR, Sanger sequencing	889-925	AY262702-AY262718
Conservation, evolution, phylogeny	Slikas et al. 2000*		Zosterops conspicillatus conspicillatus	White-eyes	1940s	Guam	Holocene	Museum skins	Mt	PCR, Sanger sequencing	191-309	AF168425- AF168459 AF168460- AF168464
Conservation, extinction, phylogeny, taxonomy	Saitoh et al. 2012*		Acrocephalus luscinius nijoi / nijoi	Arguiguan Reed-Warbler	20th C	Mariana Islands	Holocene	Toe pad	Mt	PCR, Sanger sequencing	207-900	JX073653–655
Conservation, identification	Cooper et al. 1996		Anas laysanensis	Laysan duck	Not extinct	Hawaii	Holocene	Bone	Mt	Cloning, PCR, Sanger sequencing	133-312
Conservation, identification, novel substrate, palaeodiet	Wood et al. 2012	Dactylanthus taylorii, ecological interactions, herbivory, kakapo, New Zealand, pollination, Strigops habroptilus	Strigops habroptilus	Kakapo	Not extinct	New Zealand	Holocene	Coprolites	Mt	PCR, Sanger sequencing	72
Conservation, past biodiversity, past genetic diversity, phylogeny	Shepherd and Lambert 2008	Ancient DNA, Apteryx, conservation, cryptic taxa, kiwi, mtDNA	Apteryx	Kiwi	Not extinct	New Zealand	Holocene ca. 50-4000 ybp	Museum skins, bone	Mt	PCR, Sanger seqeunicng	641	AY713367, AY713368, AY713369, AY713348, AY713349, AY713365, AY713370, AY713359, AY713345, AY713351, AY713343, AY713366, AY713352, AY713355, AY713344, AY713346, AY713347, AY713360, AY713356, AY713361+
	Shepherd et al. 2012		Apteryx spp.	Kiwi	Not extinct	New Zealand	Holocene	Museum skins, bone	Mt	PCR, Sanger seqeunicng	871
	Heupink et al. 2012	King penguin, Macquarie Island, genetic diversity, ancient DNA, conservation	Aptenodytes patagonicus	King penguin	Not extinct	Antarctica	Holocene ca. 1002 ybp	Bone	Mt	PCR, Sanger sequencing	374
Conservation, phylogeny	Robinson and Matthee 1999		Struthio camelus syriacus	Ostrich	1939	Saudi Arabia	Holocene	Feather, tissue	Mt	PCR, Sanger sequencing	469	AF073001-AF073018
Development, functional genomics, palaeognath, phenotype	Huynen et al. 2014	Tbx5, Moa, gene expression, ancient DNA, development, forelimb	Dinornithiformes	Moa	ca. 13th C	New Zealand	Holocene	Bone	Nu	PCR, Sanger sequencing
Divergence time, evolution, palaeognath, phylogeny, taxonomy	Baker et al. 2005	Adaptive radiation, extinct moas, environmental changes	Dinornithiformes	Moa	ca. 13th C	New Zealand	Holocene	Bone	Mt	PCR, Sanger sequencing	658	Y299860, AY299862–AY299864, AY299866, AY299867, AY299869, AY299870, AY299872, AY299873–AY299877, AY299881–AY299885, AY299888, AY299891, AY299895, AY299899 –AY299901, AY299903, AY299904, AY299906 – AY299908, AY199912, AY299914, AY299916, AY299920, AY299922–AY299930, AY299934,AY299935, AY299938 –AY299941, AY299943, AY299944, AY299948, AY299954 –AY299957, AY299969, AY299971, DQ023671–DQ023695, DQ029…
Divergence time, evolution, phylogeny	Soares et al. 2016	Columbidae, ancient DNA, time calibrated phylogeny, Pezophaps solitaria, Raphus cucullatus, passenger pigeon	Ectopistes migratorius, Columba jouyi , Alopecoenas salamonis, Caloenas maculata, Pezophaps solitaria, Raphus cucullatus	Ryukyu wood pigeon, thick-billed ground dove, spotted green pigeon, Rodrigues solitaire, the dodo	1936, 1927, 1820s?, mid-1700s, 1662	Ryukyu Islands, Solomon Islands, Rodrigues, Mauritius	Holocene	Bone powder, feather, toe pads	Full Mt	NGS (Illumina), shotgun	~17000	KX902249, KX902250, KX902247, KX902238, KX902236, KX902243-4
Divergence time, palaeogenomics, population history	Parks et al. 2015	Ancient DNA, population genomics, Adélie penguin, evolutionary rates	Pygoscelis adeliae	Adélie penguins	Not extinct	Antarctica	Holocene (00s-7000 ybp)	Bone	Full Mt, draft genome	NGS (Illumina), shotgun	17486	KC875855.1
Divergence time, palaeognath, phylogeny	Paton et al. 2002*	Phylogeny, mitochondrial DNA genomes, Charadriiformes, molecular dating	Anomalopteryx didiformis, Emeus crassus	Moa	ca. 13th C	New Zealand	Holocene		Mt	Reanalysis	NA	NA
Divergence time, phylogeny	Shapiro et al. 2002*		Raphus cucullatus, Ectopistes migratorius	Dodo, Passenger pigeon	1662, 1914	Mauritius	Holocene	Museum specimens	Mt	PCR, Sanger sequencing	233-1052	AF483338,AF483301,AF483314,AF483351
	Fleisscher et al. 2006*	Campephilus principalis, ivory-billed woodpecke, Pleistocene divergenc, phylogenetics, DNA barcoding	Campephilus principalis	Ivory-billed woodpecker	20th C	USA, Cuba	Holocene	Toe pad	Mt	PCR, Sanger sequencing	103-551	DQ518876-936
	Tennyson et al. 2017	New species, extinction, Puffinus, shearwater, Procellariiformes, New Zealand	Puffinus spleaeus	Scarlett's Shearwater	ca. 16th C	New Zealand	Holocene	Bone	Mt	PCR, Sanger sequencing	146-851	KX580999-KX58009
Divergence time, phylogeny, population history	Fuchs et al. 2016*	Population history, ecological niche modeling, island biogeography, MAXENT, mitochondrial sequence data, phylogenetic constraints, taxon cycle	Nesillas aldabrana	Brush-warbler	1983	Madagascar	Holocene	Toe pad	Mt	PCR	1088	KX133838
Divergence time, phylogeny, taxonomy	Seabrook-Davidson et al. 2009		Coturnix	New Zealand quail	1870s	New Zealand	Holocene	Footpad, feathers	Mt	PCR, Sanger sequencing	213-673	GQ150346-GQ150377, GQ150388-GQ15039, GQ150378- GQ150387
Divergence time, population history	Ritchie et al. 2004	Molecular clock, phylogeography, control region, Bayesian inference, rate heterogeneity	Pygoscelis adeliae	Adélie penguins	Not extinct	Antarctica	Holocene (00s-7000 ybp)	Bone	Mt	PCR, Sanger sequencing	352-591	AY525167–AY525326
Domestication	Storey et al. 2007	Ancient DNA, Gallus gallus, Polynesia	Gallus gallus	Chicken	Not extinct	Chile, Tonga, American Samoa, Niue, Easter Island	Holocene (600 ybp)	Bone	Mt	PCR, Sanger seqeunicng
	Storey et al. 2010	Mitochondrial DNA, ancient DNA, chicken, pacific, Lapita, Vanuatu, archaeology	Gallus gallus	Chicken	Not extinct	Vanuatu	Holocene	Bone	Mt	Cloning, PCR, Sanger sequencing
	Speller et al. 2010	Meleagris gallopavo, Southwest US, ancestral Puebloans, Mesoamerica	Meleagris gallopavo	Turkey	Not extinct	USA	Holocene	Bones, coprolites, museum tissue	Mt	PCR, Sanger seqeunicng	438
Domestication, functional genomics, phenotype	Flink et al. 2014	Selective sweep, breed formation, animal domestication, Gallus gallus, cultural history	Gallus gallus	Chicken	Not extinct	UK, Germany, Greece	Holocene (280 BC - 18th C)	Bone	Mt, Nu	PCR, Sanger sequencing	201	KF753251- KF753289
	Loog et al. 2017	Ancient DNA, selection, Bayesian analyses, TSHR, BCO2, domestication	Gallus gallus	Chicken	Not extinct	Morocco, Turkey	Holocene (2200 ya-present)	Bone	Nu	PCR, pyrosequencing
Domestication, population history	Storey et al. 2012		Gallus gallus	Chicken	Not extinct	Solomon Islands, Federated States of Micronesia, Vanuatu, Tonga, Samoa, Niue, Hawaii, Easter Island), Thailand, Spain, Chile, Americas	Holocene	Bone	Mt	PCR, Sanger sequencing
Eggshell, identification	Chilton and Sorenson 2007	Camptorhynchus labradorius, DNA analysis, eggs, Labrador Duck	Camptorhynchus labradorius	Labrador duck	ca. 1878	Canada	Holocene (mid-1800s)	Eggshell	Mt	PCR, Sanger sequencing	72-137	DQ831207,DQ831199
Evolution	Millar et al. 2008*		Pygoscelis adeliae	Adélie penguins	Not extinct	Antarctica	Holocene, Pleistocene (up to 37,000 ybp)	Bone	Mt	PCR, Sanger sequencing
Evolution, palaeogenomics	Subramanian et al. 2009*		Pygoscelis adeliae	Adélie penguins	Not extinct	Antarctica	Holocene, Pleistocene (250-44,000 ybp)	Bone	Mt	Supp info?	12.5-16.1kb
Evolution, phylogeny	Paxinos et al. 2002*		Branta hylobadistes	Woodwalking goose	ca. 1000 AD	Hawaii, Maui	Holocene	Bone	Mt	PCR, Sanger sequencing
	Moum et al. 2002		Pinguinus impennis	Great auk	1840s	Iceland	Holocene (1821)	Tissue	Mt	Cloning, PCR, Sanger sequencing	4258
Extinction	Johnson and Dunn 2006	Effective population size, extinction, genetic drift, grouse, heath hen, mtDNA control region, population genetic variability	Tympanuchus cupido cupido	Heath hen	1932	USA	Holocene	Toe pad	Mt	PCR, Sanger sequencing	1150	AF532426–AF532429, AJ297160– AJ297161
Extinction, divergence time, palaeoecology, phylogeny, taxonomy	Wood et al. 2014	Ancient DNA, avian palaeontology, isotopes, kaka, kea, morphometrics, phylogenetics	Nestoridae	Nestorid parrot	ca. 13-16th C	Chatham Islands, New Zealand	Holocene	Bone	Mt	Capture, NGS (Ion Torrent), shotgun	798-935	KF787632, KF787633
Extinction, gut microbiome, novel substrate, palaeognath	Wood et al. 2013		Pachyornis elephantopus, Dinornis robustus, Anomalopteryx didiformis, Megalapteryx didinus	Heavy-footed moa, South Island giant moa, little bush moa, upland moa	ca. 13th C	New Zealand	Holocene	Coprolites	Nu	PCR and ??	40-400	KC405320– KC405484
Extinction, novel substrate, palaeodiet, palaeoecology, palaeognath	Wood et al. 2013		Dinornithiformes	Moa	ca. 13th C	New Zealand	Holocene	Coprolites	Mt, Chl	Cloning, PCR, Sanger sequencing	31-95
Extinction, palaeognath, population history	Gemmell et al. 2004*	Dinornis, mtDNA, coalescent, population size, extinction	Dinornis	Moa	ca. 13th C	New Zealand	Holocene		Mt	Reanalysis
	Allentoft et al. 2014		Dinornis robustus, Pachyornis elephantopus, Emeus curtus, Emeus crassus	Moa	ca. 13th C	New Zealand	Holocene (602-12,966 ybp)	Bone	Mt, Nu	Microsattelite typing, PCR, sequencing?	337-341	KJ533749–KJ533834, KJ533835–KJ53391, KJ533913–KJ533991, KJ533992–KJ534022
Extinction, phylogeny, taxonomy	Pertoldi et al. 2006	Button quail, cytochrome b gene, Donana National Park, mitochondrial DNA, molecular phylogeny, Turniciformes	Turnix sylvatica sylvatica	Andalusian hemipode	1981	Spain	Holocene	Museum skins	Mt	PCR, Sanger sequencing	606	AY703821
	Welch et al. 2014	Cytochrome b, extinction, petrel, phylogeny, Pseudobulweria, Pterodroma, St Helena	Pterodroma rupinarum	St Helena petrel	1502	St Helena Island	Holocene	Bone	Mt	PCR, Sanger sequencing	949	KF010837
	Jackson et al. 2015	Ecological replacements, evolution, invasive alien species, Psittacula	Psittacula exsul, P. wardi, P. eques	Indian Ocean parrots	1732-1906	Seychelles, Reunion, Rodrigues	Holocene	Toe pad	Mt	PCR, Sanger sequencing	503-785	LN614516,LN614515,LN614517
Extinction, population history	Hung et al. 2014	Genome sequences, ancient DNA, toe pad	Ectopistes migratorius	Passenger pigeon	1914	USA	Holocene	Toe pad	Full genome	NGS (Illumina), shotgun
	Boessenkool et al. 2009	Megadyptes antipodes, ancient DNA, New Zealand, palaeontology, Polynesian, extinction	Megadyptes antipodes	Yellow-eyed penguin	Not extinct	New Zealand	Holocene (500-1700 AD)	Toe pad, bones	Mt	PCR, Sanger sequencing	399-402	FJ391944–FJ391968
	Lagerholm et al. 2017		Lagopus lagopus, Lagopus muta	Willow and Rock ptarmigan	Not extinct	UK, Belgium, Germany, France, Poland, Russia	Pleistocene (11,000-27,000 ybp)	Bone	Mt	PCR, Sanger sequencing	240
	Rawlence et al. 2015	Ancient DNA, extinction, Megadyptes antipodes, Megadyptes waitaha, penguin, radiocarbon-dating, turnover	Megadyptes waitaha	Waitaha penguin	ca. 15th C	New Zealand	Holocene	?	Mt	PCR, Sanger sequencing	402	KP644148- KP644153
Functional genomics, palaeognath, phenotype	Aidala et al. 2012*	Avian communication, sensory ecology, perching birds, SWS1 opsin, Ultraviolet vision	Emeus crassus, Euryapteryx curtus, Euryapteryx gravis, Pachyornis elephantopus, Pachyornis geranoides	Moa	ca. 13th C	New Zealand	Holocene	Bone	Nu	PCR, Sanger sequencing
Identification	Tennyson et al. 2015		Pterodroma imberi	Petrel	ca. 19th C	Chatham Islands, New Zealand	Holocene	Bone	Mt	PCR, Sanger sequencing	76-522	KT001455-7,KT027379-80
	Fleischer et al. 2000		Haliaeetus	Hawaiian Eagle	?	Hawaii	Holocene (3300 ybp)	Bone	Mt	PCR, Sanger sequencing	704
	Thomas et al. 2017	Ancient DNA, extinct birds, mitochondrial genome, museum specimens, palaeogenomics	Pinguinus impennis	Great auk	173 ya	Iceland	Holocene	Museum skin	Full Mt	NGS (Illumina), shotgun	13,267-16,698	MF188883-9
Identification, methods	Patel et al. 2010*	5'-tags, avian primers, COI, cox1, DNA barcoding, species identification	Ciconiiformes, Charadriiformes, Falconiformes, Gruiformes, Procellariiformes, Sphenisciformes				Holocene	Museum skins	Mt	Barcoding, PCR, Sanger sequencing	648
Identification, methods, palaeognath	Lambert et al. 2005		Pachyornis mappini, Pachyornis elephantopus, Pachyornis australis, Euryapteryx geranoides, Euryapteryx curtus, Emeus crassus, Anomalopteryx didiformis, Dinornis robustus, Dinornis novaezealandiae, Megalapteryx didinus	Moa	ca. 13th C	New Zealand	Holocene	Bone	MT	PCR, Sanger sequencing	596
Identification, novel substrate, palaeodiet, palaeognath	Wood et al. 2012	Ancient DNA, Dinornithiformes, moa, pollen	Anomalopteryx didiformis	Little bush moa	ca. 13th C	New Zealand	Holocene (1185-1521 ybp)	Coprolites	Mt	PCR and ??	11-31
Identification, novel substrate, palaeognath	Wood et al. 2008		Dinornis robustus, Megalapteryx didinus, Pachyornis elephantopus, Euryapteryx gravis	South Island giant moa, upland moa, heavy-footed moa, sout-legged moa	ca. 13th C	New Zealand	Holocene (954-3319 ybp)	Coprolites	Mt	PCR, Sanger sequencing	11-200	FJ214598–FJ214618
	Jain et al. 2017		Struthio sp.	Ostrich		India	Pleistocene (>25000 ybp)	Eggshell	Mt	Cloning, PCR, Sanger sequencing	43
Identification, palaeognath	Huynen et al. 2008*	Anomalopteryx didiformis, Dinornis novaezealandiae, HVR1, mtDNA control region, moa	Anomalopteryx didiformis, Dinornis novaezealandiae	Moa	ca. 13th C	New Zealand	Holocene	Bone	Mt	PCR, Sanger sequencing
Identification, taxonomy	Steeves et al. 2010	Sula tasmani, Sula dactylatra fullagari, masked booby, ancient DNA, mitochondrial DNA, phylogeography	Sula tasmani	Tasman booby	ca. late 18th C	Norfolk Island	Holocene	Bone	Mt	PCR Sanger sequencing	500
Metabarcoding, novel substrate	Epp et al. 2012	Ancient DNA, arctic, environmental DNA, metabarcoding, primers	Inconclusive	Inconclusive	NA	Siberia	Pleistocene (15,000-50,000 ybp)	Permafrost	Mt	Cloning, PCR, Sanger sequencing
Methods, novel substrate, palaeognath	Haile et al. 2007	aDNA, sediment, environmental reconstructions, extinctions, leaching	Dinornis, Pachyornis, Anomalopteryx	Moa	ca. 500 ybp	New Zealand	Holocene	Sediment	Mt	Cloning, PCR, Sanger sequencing	88-153
	Oskam et al. 2010	Ancient DNA, extinct birds, palaeontology, archaeology, eggshell	Aepyornis Dromaius Genyornis Dinornithiformes	Elephant bird Emu Moa Dabbling duck	Holocene 400-19000 ybp 50,000 ybp 500-3000 ybp	Australia, Madagascar, New Zealand	Holocene, Pleistocene	Eggshell	Mt, Nu	Cloning, PCR, Sanger sequencing	125-250	GU799584–GU799601
Methods, palaeognath	Allentoft et al. 2009	Ancient DNA, microsatellite development, extinct species, high-throughput 454 sequencing	Pachyornis elephantopus, Dinornis robustus, Emeus gravis	Heavy-footed moa, South Island giant moa, stout-legged moa	ca. 15th C	New Zealand	Holocene	Bone	Mt, Nu	Microsatellite typing, NGS (454) PCR, Sanger sequencing, shotgun	242, 106-136
	Allentoft et al. 2011		Dinornis robustus	South Island giant moa	ca. 13th C	New Zealand	Holocene	Bone	Nu	Microsatellite typing, NGS (454) PCR, Sanger sequencing, shotgun	108-224	HQ823574 - HQ823578
	Allentoft et al. 2015		Dinornis robustus	South Island giant moa	ca. 13th C	New Zealand	Holocene	Bone	Nu	Microsatellite typing, NGS (454) PCR, Sanger sequencing, shotgun	108-224
	Huynen et al. 2015	Forensic science, ancient DNA, DNA extraction, bone, hydrochloric acid	Anomalopteryx didiformis, Euryapteryx curtus	Moa	ca. 13th C	New Zealand	Holocene	Bone	Mt, Nu	PCR, Sanger sequencing	70-72 bp
Methods, palaeognath, sexual dimorphism	Allentoft et al. 2010		Dinornis robustus, Euryapteryx curtus, Emeus crassus, Pachyornis elephantopus	Moa	ca. 13th C	New Zealand	Holocene, Pleistocene (3740-1245 ybp)	Bone	Mt, Nu	PCR, sex typing
Methods, past genetic diversity, population history	Shepherd et al. 2005	Microsatellites, Adélie penguins, ancient DNA	Pygoscelis adeliae	Adélie penguins	Not extinct	Antarctica	Holocene (6000 ybp)	Bone	Nu	Microsatellite typing, PCR, Sanger sequencing
Novel substrate , past biodiversity	Hofreiter et al. 2003*		Cathartidae	Condors and vultures	Not extinct	USA	Holocene, Pleistocene (10,845 ybp)	Sediment	Mt	Cloning, PCR, Sanger sequencing
Novel substrate, palaeodiet, palaeoenvironment, palaeognath	Wood et al. 2012		Megalapteryx didinus	Moa	ca. 13th C	New Zealand	Holocene (694-6368 ybp)	Coprolites	Mt, Chl	Cloning, PCR, Sanger sequencing	31-95
	Rawlence et al. 2016	Bone, canopy effect, collagen, carbon, diet, moa, nitrogen, water use effect	Pachyornis elephantopus, Dinornis robustus, Anomalopteryx didiformis	Moa	ca. 13th C	New Zealand	Holocene	Bone, coprolite, gizzard		Reanalysis
Novel substrate, palaeognath, phenotype	Rawlence et al. 2009	Ancient DNA, feathers, moa, phenotype, plumage reconstruction	Megalapteryx didinus, Dinornis robustus, Euryapteryx gravis, Pachyornis elephantopus	Upland moa, South Island giant moa, stout-legged moa, heavy-footed moa	ca. 13th C	New Zealand	Holocene	Feathers	Mt	PCR, Sanger sequencing	31-361	GQ253938–GQ253945
	Willerslev et al. 2003*		Megalapteryx didinus, Pachyornis elephantopus, Euryapteryx curtus, Cyanoramphus novaezeelandiae	Upland moa, heavy-footed moa, coastal moa, New Zealand Parakeet	ca. 13th C	New Zealand	Holocene (624-3000 ybp	Sediment	Mt	Cloning, PCR, Sanger sequencing	202-234
Palaeoecology, phylogeny, taxonomy	Wood et al. 2016	Ancient DNA, birds, morphometrics, New Zealand, osteology, taxonomy	Sceloglaux albifacies	Laughing owl	ca. 13th C	New Zealand	Holocene	Toe pad	Full Mt	Capture,, NGS (Illumina), shotgun	16565	KX098448
Palaeoenvironment, palaeognath,phylogeny, population history	Rawlence et al. 2012	Ancient DNA, climate change, Dinornithiformes, extinction, habitat tracking, isotopes, megafauna, moa, New Zealand, population populations	Pachyornis australis, Pachyornis elephantopus	Crested moa, heavy-fotted moa	ca. 13th C	New Zealand	Holocene	Bone	Mt	PCR, Sanger sequencing	49-205
Palaeogenomics	Hung et al. 2013		Ectopistes migratorius	Passenger pigeon	1914	USA	Holocene	Toe pad	Full Mt	NGS (Illumina), shotgun	16715	JQ692598
	Anmarkrud and Lifjeld 2016		Pinguinus impennis, Ectopistes migratorius, Campephilus imperialis, Psephotellus pulcherrimus, Calleas cinereus, Heteralocha acutirostris, Turnagra capensis, Moho braccatus, Myadestes myadestinus, Psittirostra psittacea, Akialoa obscura	Great auk, Passenger pigeon, Imperial woodpecker, Paradise parrot, South Island Kokako, Huia, South Island Piopio, Kauai Oo, Kamao, Ou, Lesser Akialoa	1852, 1914, 1956, 1928, 1967, 1907, 1905, 1987, 1985, 1987, 1940	Iceland, USA, Mexico, Australia, NZ, Hawaii	Holocene	Toe pad	Full Mt	NGS (Illumina), shotgun	~16000	KU158188, KU158192, KU158198, KU158195, KU158191, KU158193, KU158197, KU158189, KU158194, KU158196, KU158190
Palaeognath, phylogenetic issues, phylogeny	Braun and Kimball 2002		Dinornis giganteus	Moa	ca. 13th C	New Zealand	Holocene		Mt	Reanalysis
Palaeognath, past genetic diversity, population history	Cooper and Cooper 1995		Dinornis novaezealandiae, Megalapteryx didinus, Anomalopteryx didiformis, Pachyornis elephantopus, P. mappini, Emeus crassus, Xenicus longipes	Moa, wrens	ca. 13th C	New Zealand	Holocene	Museum specimens, Skin, bone, blood	Mt	PCR, Sanger sequencing
Palaeognath, phylogeny	Heupink et al. 2011		Dromaius ater	King Island emu	1800s	Australia	Holocene	Bone	Mt, Nu	PCR, Sanger sequencing	1601	HQ910418-HQ910432.
Palaeognath, phylogeography, population history	McCallum et al. 2013		Dinornithiformes	Moa	ca. 13th C	New Zealand	Holocene	Bone	Mt	PCR, Sanger sequencing, sex typing	683
Palaeognath, phylogeography, sexual dimorphism, taxonomy	Bunce et al. 2003		Dinornis	Moa	500 ya	New Zealand	Holocene	Bone	Mt, Nu	Cloning, PCR, Sanger sequencing, sex typing	1960
Palaeognath, sexual dimorphism, taxonomy	Huynen et al. 2003		Dinornithiformes	Moa	ca. 13th C	New Zealand	Holocene	Bone	Mt, Nu	PCR, Sanger sequencing, sex typing	203-240
Palaeognath, taxonomy	Huynen et al. 2014		Euryapteryx	Moa	ca. 13th C	New Zealand	Holocene	Bone	Mt	Barcoding, PCR, Sanger sequencing	389-677
Past genetic diversity, population history	Lambert et al. 2002		Pygoscelis adeliae	Adélie penguins	Not extinct	Antarctica	Holocene (7000 ybp)	Bone	Mt	PCR, Sanger sequencing?	390-1600
	Lawrence et al. 2008	Ancient DNA, mitochondrial, cytochrome b, petrel, Procellariiformes, Pterodroma magentae	Pterodroma magentae	Chatham Island Taiko	Not extinct	Chatham Islands	Holocene	Bone	Mt	PCR, Sanger seqeunicng	311	EU794335-EU794378
	Dussex et al. 2015		Nestor notabilis	Kea	Not extinct	New Zealand	Holocene (<11.6 kya)	Bone, Museum skins	Mt, Nu	Microsattelite typing, PCR, Sanger sequencing	150-250
Phylogeny	Houde et al. 1997*		Aptornis	Adzebill	ca. 1000 ybp	New Zealand	Holocene	Museum skins, bone	Mt	PCR, Sanger sequencing	673	ADU76019
	Zink et al. 1999*		Toxostoma guttatum	Thrashers	ca. 2006?	Mexico	Holocene	Museum skins	Mt	PCR, Sanger sequencing	435-1737	AF130236,AH008199
	Tebbutt and Simons 2002	Ancient DNA, extinct fauna, birds, Passeriformes	Heteralocha acutirostris	Huia	1907	New Zealand	Holocene	Bone	Mt, Nu	PCR, Sanger sequencing	182	AF470617
	Dumbacher et al. 2003*	Aegothelidae, Owlet-nightjar, phylogeny, mitochondrial DNA, biogeography, maximum likelihood, molecular systematics, systematics	Aegotheles novazealandiae	Owlet-nightjars	ca. 1200 AD	New Caledonia, New Zealand	Holocene	Museum specimens, bone	Mt	PCR, Sanger sequencing	193-550	AY090664–AY090698, AY090699–AY09073
	Sheldon et al. 2005*	Swallow phylogeny, Hirundinidae, DNA sequencing, mitochondrial DNA, nuclear DNA	Pseudochelidon sirintarae	White-eyed river martin	1980 (questionable)	Thailand	Holocene	Museum tissue	Mt	PCR, Sanger sequencing	768	AY826049
	Johansson et al. 2011	Phylogenetic analysis, introns, passerines, birds, Gondwana, animal phylogenetics, Cretaceous period, New Zealand	Turnagra capensis	South Island Piopio	Late 1800s	New Zealand	Holocene	Foot pad	Nu	PCR	296-707	JN571532-4
	Kirchman et al. 2012	Arini, Carolina parakeet, Conuropsis carolinensis, extinct species, historic DNA, phylogenetics, systematics	Conuropsis carolinensis	Carolina parakeet	1930s	USA	Holocene	Toe pad	Mt	PCR, Sanger sequencing	238-375	GU826189, GU826190, HQ270495, HQ270496
	Fulton et al. 2012	Ancient DNA, Columbidae, Columbiformes, pigeons, doves, phylogeny,systematics	Ectopistes migratorius	Passenger pigeon	1914	USA, Canada	Holocene	Toe pad	Nu	PCR, Sanger sequencing	444	JF312866
	Podsiadlowski et al. 2016	Mascarinus, Mascarin, Coracopsis, Psittacula, extinction, Indian Ocean parrots	Mascarinus mascarinus	Mascarene parrot	ca. 1800	Mauritius, Reunion, Rodriguez	Holocene	Foot pad	Mt	PCR, Sanger sequencing	595	KX663839
Phylogeny, phylogeography, taxonomy	Cooper 1994	Acanthisittidae, ancient DNA, ancient populations, avian 12S DNA, contamination, New Zealand wrens	Xenicus longipes variabilis	Wrens	ca. late 19th C	New Zealand	Holocene	Museum skins	Mt	PCR, Sanger sequencing	202
Phylogeny, taxonomy	Groenenberg et al. 2008		Gallinula nesiotis	Flightless island hens	late 19th C	Tristan da Cunha	Holocene	Museum tissue	Mt	Cloning, PCR, Sanger sequencing	679	EF681971-EF682015
	Kirchman et al. 2010	Ancient DNA, Andes Mountains, hummingbird, hybrid, extinction	Heliangelus zusii	Bogota sunangel	ca. 1900	Colombia	Holocene	Toe pad	Mt	PCR, Sanger sequencing	332-588	GU166851,GU166861
	Lovette et al. 2010*	Parulidae, wood-warbler, systematics, phylogeny, classification	Vermivora bachmanii, Leucopeza semperi	Bachman's warbler, Semper's warbler	1988?,1960s?	USA, St Lucia, Mexico, Brazil	Holocene	Toe pad	Mt	PCR	1041-1070	GU932360, GU932358, DQ233487, DQ233481, DQ233482, DQ233483, EU815773
	Cibois et al. 2011*		Acrocephalus luscinius astrolabii	Nightingale reed warbler	1960s	Gambier Islands	Holocene	Museum skins	Mt	PCR, Sanger sequencing	174-879	HQ844275,HQ844337,HQ844385
	Zuccon et al. 2012*	Fringillidae, Drepanidinae, Carpodacus, Chaunoproctus, phylogeny	Chaunoproctus ferreorostris	Finches	mid-1800s	Bonin Islands	Holocene	Toe pad	Mt	PCR, Sanger sequencing	351-1041	JN715445, JN715536
	Zuccon and Ericson 2012	Dispersal, osteology, extinct birds, Turngara, Oriolidae, archival DNA	Turnagra capensis	Piopio	ca. 1900	New Zealand	Holocene	Toe pad	Mt, Nu	PCR, Sanger sequencing	295-1041	JN614498,JN614557,JN614608, JN614707,JN614741,JN614779,JN614830,JN614879
	Heupink et al. 2014	Spotted green pigeon, Caloenas maculata, Dodo, Raphus cucullatus, extinct, museum specimen, DNA extraction, ancient DNA, mini-barcode, phylogeny	Caloenas maculata	Spotted green pigeon	1820s?	Oceania	Holocene	Feathers	Mt	PCR, Sanger sequencing	59-79	KF740727-KF740729
	Ramirez et al. 2010		Puffinus olsoni	Lava Shearwater	ca. 14th C	Canary Islands	Holocene (750-969 ybp)	Bone	Mt	PCR, Sanger seqeunicng	484	HQ651230
Phylogeny, trait evolution	Fleischer et al. 2008*		Moho, Chaetoptila	Hawaiian honeyeaters	1850s-1980s	Hawaii	Holocene	Museum tissue	Mt, Nu	PCR, Sanger sequencing	81-332	FJ378061,FJ383122,FJ378045,FJ383125+
Phylogeography	Murphy et al. 2006*		Callaeas cinerea	Kokako	1967?	New Zealand	Holocene	Museum skins	Mt	PCR, Sanger sequencing	323-403	AF433175-209
Population history	Grosser et al. 2016	Ancient DNA, biodiversity, Eudyptula, extinction, penguins, species turnover	Eudyptula novaehollandiae	Australian little penguin	Not extinct	New Zealand	Holocene (AD1600)	Bone	Mt	PCR, Sanger sequencing
	Welch et al. 2012	Ancient DNA, population bottleneck, gene flow, generation time, Hawaiian petrel, Pterodroma	Pterodroma sandwichensis	Hawaiian petrel	Not extinct	Hawaii	Holocene	Bone, Museum specimens	Mt	PCR, Sanger seqeunicng	524
Population structure, sexual dimorphism	Lambert et al . 2009		Heteralocha acutirostris	Huia	1907	New Zealand	Holocene	Foot pad	Mt, Nu	Cloning, fluorescent genotyping, PCR, Restriction enzyme, Sanger sequencing	199	GU176413– GU176433
Supplementary References
Aidala, Z., Huynen, L., Brennan, P. L. R., Musser, J., Fidler, A., Chong, N., Capuska, G. E. M., Anderson, M. G., Talaba, A., Lambert, D., Hauber, M. E. (2012). Ultraviolet visual sensitivity in three avian lineages: palaeognaths, parrots, and passerines. Journal of Comparative Physiology A, 198, 495-510.
Allentoft, M.E., Collins, M., Harker, D., Haile, J., Oskam, C. L., Hale, M. L., Campos, P. F., Samaneigo, J. A., Gilbert, T. P., Willerslev, E., Zhang, G., Scofield, P., Hodaway, R. N., Bunce, M. (2012). The half-life of DNA in bone: measuring decay kinetics in 158 dated fossils. In: Proceedings of the Royal Society B-Biological Sciences, 1745, 1-10.
Allentoft, M.E., Oskam, C., Houston, J., Hale, M.L., Gilbert, M.T.P., Rasmussen, M. et al. (2011). Profiling the Dead: Generating Microsatellite Data from Fossil Bones of Extinct Megafauna-Protocols, Problems, and Prospects. Plos One, 6.
Allentoft, M.E. & Rawlence, N.J. (2012). Moa's Ark or volant ghosts of Gondwana? Insights from nineteen years of ancient DNA research on the extinct moa (Aves: Dinornithiformes) of New Zealand. Annals of Anatomy-Anatomischer Anzeiger, 194, 36-51.
Allentoft, M.E., Schuster, S.C., Holdaway, R.N., Hale, M.L., McLay, E., Oskam, C. et al. (2009). Identification of microsatellites from an extinct moa species using high-throughput (454) sequence data. Biotechniques, 46, 195-+.
Allentoft, M.E., Bunce, M., Scofield, R. P., Hale, M. L., Holdaway, R. N. (2010). Highly skewed sex ratios and biased fossil deposition of moa: ancient DNA provides new insight on New Zealand's extinct megafauna. Quaternary Science Reviews, 29, 753-762.
Allentoft, M.E., Heller, R., Oskam, C. L., Lorenzen, E. D., Hale, M. L., Gilbert, M. T. P., Jacomb, C., Holdaway, R. N., Bunce, M. (2014). Extinct New Zealand megafauna were not in decline before human colonization. Proceedings of the National Academy of Sciences, 111, 4922-4927.
Allentoft, M. E., Heller, R., Holdaway, R. N., Bunce, M. (2015). Ancient DNA microsatellite analyses of the extinct New Zealand giant moa (Dinornis robustus) identify relatives within a single fossil site. Heredity, 115, 481-487.
Andersen, M.J., Shult, H.T., Cibois, A., Thibault, J.C., Filardi, C.E., Moyle, R.G. (2015). Rapid diversification and secondary sympatry in Australo-Pacific kingfishers (Aves: Alcedinidae: Todiramphus). Royal Society Open Science, 2.
Anmarkrud, J.A., & Lifjeld, J. T. (2016). Complete mitochondrial genomes of eleven extinct or possibly extinct bird species. Molecular Ecology Resources, 17, 334-341.
Austin, J.J., Joseph, L., Pedler, L.P., Black, A.B. (2013). Uncovering cryptic evolutionary diversity in extant and extinct populations of the southern Australian arid zone Western and Thick-billed Grasswrens (Passeriformes: Maluridae: Amytornis). Conservation Genetics, 14, 1173-1184.
Baker, A.J., Haddrath, Oliver, McPherson, John D., Cloutier, Alison (2014). Genomic support for a moa-tinamou clade and adaptive morphological convergence in flightless ratites. Mol Biol Evol, 31, 1686-1696.
Baker, A.J., Huynen, L.J., Haddrath, O., Millar, C.D., Lambert, D.M. (2005). Reconstructing the tempo and mode of evolution in an extinct clade of birds with ancient DNA: The giant moas of New Zealand. Proceedings of the National Academy of Sciences of the United States of America, 102, 8257-8262.
Barnes, I., Dobney, K. M., Young, J. P. W. (1998). The Molecular Palaeoecology of geese: identification of archaeological goose remains using ancient DNA analysis. International Journal of Osteoarchaeology, 8, 280-287.
Boessenkool, S., Austin, J.J., Worthy, T.H., Scofield, P., Cooper, A., Seddon, P.J. et al. (2009). Relict or colonizer? Extinction and range expansion of penguins in southern New Zealand. Proceedings of the Royal Society B-Biological Sciences, 276, 815-821.
Braun, E.L. & Kimball, R.T. (2002). Examining Basal avian divergences with mitochondrial sequences: model complexity, taxon sampling, and sequence length. Systems Biology, 51, 614-625.
Bunce, M., Worthy, T.H., Ford, T., Hoppitt, W., Willerslev, E., Drummond, A. et al. (2003). Extreme reversed sexual size dimorphism in the extinct New Zealand moa Dinornis. Nature, 425, 172-175.
Bunce, M., Worthy, T.H., Phillips, M.J., Holdaway, R.N., Willerslev, E., Haile, J. et al. (2009). The evolutionary history of the extinct ratite moa and New Zealand Neogene paleogeography. Proceedings of the National Academy of Sciences of the United States of America, 106, 20646-20651.
Bunce, M., Szulkin, M., Lerner, H. R. L., Barnes, I., Shapiro, B., Cooper, A., Holdaway, R. N. (2005). Ancient DNA provides new insights into the evolutionary history of New Zealand's extinct giant eagle. Plos Biology
Chilton, G. & Sorenson, M.D. (2007). Genetic identification of eggs purportedly from the extinct Labrador Duck (Camptorhynchus labradorius). Auk, 124, 962-968.
Christidis, L., Leeton, P.R. & Westerman, M. (1996). Were bowerbirds part of the New Zealand fauna? Proceedings of the National Academy of Sciences of the United States of America, 93, 3898-3901.
Cibois, A., Beadell, J.S., Graves, G.R., Pasquet, E., Slikas, B., Sonsthagen, S.A. et al. (2011). Charting the course of reed-warblers across the Pacific islands. Journal of Biogeography, 38, 1963-1975.
Cibois, A., Dekker, R.W.R.J., Pasquet, E., Thibault, J.C. (2012). New insights into the systematics of the enigmatic Polynesian sandpipers Aechmorhynchus parvirostris and Prosobonia leucoptera. Ibis, 154, 756-767.
Cibois, A., Thibault, J.C., Bonillo, C., Filardi, C.E., Watling, D., Pasquet, E. (2014). Phylogeny and biogeography of the fruit doves (Aves: Columbidae). Mol ecular Phylogenetics and Evolution, 70, 442-453.
Cibois, A., Thibault, J.C., Pasquet, E. (2004). Biogeography of eastern polynesian monarchs (Pomarea): An endemic genus close to extinction. Condor, 106, 837-851.
Cibois, A., Thibault, J.C., Pasquet, E. (2008). Systematics of the extinct reed warblers Acrocephalus of the Society Islands of eastern Polynesia. Ibis, 150, 365-376.
Cooper, A. (1994). Ancient DNA-sequences reveal unsuspected phylogenetic relationships within New-Zealand wrens (Acanthiistidae). Experientia, 50, 558-563.
Cooper, A. & Cooper, R.A. (1995). The Oligocene bottleneck and New Zealand biota: genetic record of a past environmental crisis. Proceedings. Biological sciences / The Royal Society, 261, 293-302.
Cooper, A., Lalueza-Fox, C., Anderson, S., Rambaut, A., Austin, J., Ward, R. (2001). Complete mitochondrial genome sequences of two extinct moas clarify ratite evolution. Nature, 409, 704-707.
Cooper, A., Mourerchauvire, C., Chambers, G.K., Vonhaeseler, A., Wilson, A.C., Paabo, S. (1992). Independent origins of New-Zealand moas and kiwis Proceedings of the National Academy of Sciences of the United States of America, 89, 8741-8744.
Cooper, A., Rhymer, J., James, H.F., Olson, S.L., McIntosh, C.E., Sorenson, M.D. et al. (1996). Ancient DNA and island endemics. Nature, 381, 484-484.
Dumbacher, J.P., Pratt, T.K., Fleischer, R.C. (2003). Phylogeny of the owlet-nightjars (Aves: Aegothelidae) based on mitochondrial DNA sequence. Mol ecular Phylogenetics and Evolution, 29, 540-549.
Dussex, N., Rawlence, N. J., Robertson, B. C. (2015). Ancient and contemporary DNA reveal pre-human decline but no population bottleneck associated with recent human persecution in the Kea (Nestor nobabilis). PLoS One, DOI:10.1371/journal.pone.0118522.
Eda, M., Koike, H., Higuchi, H. (2016). Understanding prehistoric maritime adaptations in northern Japan: indirect evidence from ancient DNA and historical observations of albatross (Aves: Diomedeidae) bones. Quaternary International, 419, 159-164.
Eda, M., Koike, H., Kuro-o, M., Mihara, S., Hasegawa, H., Higuchi, H. (2012). Inferring the ancient population structure of the vulnerable albatross Phoebastria albatrus, combining ancient DNA, stable isotope, and morphometric analyses of archaeological samples. Conservation Genetics, 13, 143-151.
Eda, M., Baba, Y., Koike, H., Higuchi, H. (2006). Do temporal size differences influence species identification of archaeological albatross remains when using modern reference samples? Journal of Archaeological Science, 33, 349-359.
Epp, L.S., Boessenkool, S., Bellemain, E.P., Haile, J., Esposito, A., Riaz, T. et al. (2012). New environmental metabarcodes for analysing soil DNA: potential for studying past and present ecosystems. Molecular Ecology, 21, 1821-1833.
Fabre, P.H., Moltensen, M., Fjeldsa, J., Irestedt, M., Lessard, J.P., Jonsson, K.A. (2014). Multiple waves of colonization by monarch flycatchers (Myiagra, Monarchidae) across the Indo-Pacific and their implications for coexistence and speciation. Journal of Biogeography, 41, 274-286.
Fleischer, R.C., James, H.F., Olson, S.L. (2008). Convergent Evolution of Hawaiian and Australo-Pacific Honeyeaters from Distant Songbird Ancestors. Current Biology, 18, 1927-1931.
Fleischer, R.C., Kirchman, J.J., Dumbacher, J.P., Bevier, L., Dove, C., Rotzel, N.C. et al. (2006). Mid-Pleistocene divergence of Cuban and North American ivory-billed woodpeckers. Biology Letters, 2, 466-469.
Fleischer, R. C., Olson, S. L., James, H. F., Cooper, A. C. (2000). Identification of the extinct Hawaiian eagle (Haliaeetus) by mtDNA sequence analysis. The Auk, 117, 1051-1056.
Flink, L.G., Allen, R., Barnett, R., Malmstrom, H., Peters, J., Eriksson, J. et al. (2014). Establishing the validity of domestication genes using DNA from ancient chickens. Proceedings of the National Academy of Sciences of the United States of America, 111, 6184-6189.
Fuchs, J., Lemoine, D., Parra, J.L., Pons, J.M., Raherilalao, M.J., Prys-Jones, R. et al. (2016). Long-distance dispersal and inter-island colonization across the western Malagasy Region explain diversification in brush-warblers (Passeriformes: Nesillas). Biological Journal of the Linnean Society, 119, 873-889.
Fulton, T.L., Wagner, S.M., Fisher, C., Shapiro, B. (2012). Nuclear DNA from the extinct Passenger Pigeon (Ectopistes migratorius) confirms a single origin of New World pigeons. Annals of anatomy = Anatomischer Anzeiger : official organ of the Anatomische Gesellschaft, 194, 52-57.
Garcia, J.C., Gibb, G.C., Trewick, S.A. (2014). Deep global evolutionary radiation in birds: Diversification and trait evolution in the cosmopolitan bird family Rallidae. Molecular Phylogenetics and Evolution, 81, 96-108.
Garcia, J.C. & Trewick, S.A. (2015). Dispersal and speciation in purple swamphens (Rallidae: Porphyrio). Auk, 132, 140-155.
Gemmell, N.J., Schwartz, M.K., Robertson, B.C. (2004). Moa were many. Proceedings. Biological sciences / The Royal Society, 271 Suppl 6, S430-432.
Gibb, G.C., England, R., Hartig, G., McLenachan, P.A., Smith, B.L.T., McComish, B.J. et al. (2015). New Zealand Passerines Help Clarify the Diversification of Major Songbird Lineages during the Oligocene. Genome Biology and Evolution, 7, 2983-2995.
Goldberg, J., Trewick, S.A., Powlesland, R.G. (2011). Population structure and biogeography of Hemiphaga pigeons (Aves: Columbidae) on islands in the New Zealand region. Journal of Biogeography, 38, 285-298.
Grealy, A., Macken, Amy, Allentoft, Morten E., Rawlence, Nicolas J., Reed, Elizabeth, Bunce, M. (2016). An assessment of ancient DNA preservation in Holocene-Pleistocene fossil bone excavated from the world hertiage Naracoorte Caves, South Australia. Journal of Quaternary Science, 9999, 1-13.
Grealy, A., McDowell, M., Scofield, P., Murray, D., Fusco, D., Haile, J., Prideaux, G., Bunce, M. (2015). A critical evaluation of how ancient DNA bulk bone metabarcoding complements traditional palaeontological methods. Quaternary Science Reviews, 128, 37-47.
Grealy, A., Phillips, M. Miller, G., Gilbert, M.T.P., Rouillard, J. M., Lambert, D., Bunce, M., Haile, J. (2017). Eggshell palaeogenomics: palaeognath evolutionary history revealed through ancient nuclear and mitochondrial DNA from Madagascan elephant bird (Aepyornis sp.) eggshell. Molecular Phylogenetics and Evolution, 109.
Groenenberg, D.S.J., Beintema, A.J., Dekker, R.W.R.J., Gittenberger, E. (2008). Ancient DNA Elucidates the Controversy about the Flightless Island Hens (Gallinula sp.) of Tristan da Cunha. Plos One, 3.
Grosser, S., Rawlence, N.J., Anderson, C.N.K., Smith, I.W.G., Scofield, R.P., Waters, J.M. (2016). Invader or resident? Ancient-DNA reveals rapid species turnover in New Zealand little penguins. Proceedings of the Royal Society B-Biological Sciences, 283.
Haddrath, O. & Baker, A.J. (2001). Complete mitochondrial DNA genome sequences of extinct birds: ratite phylogenetics and the vicariance biogeography hypothesis. Proceedings of the Royal Society B-Biological Sciences, 268, 939-945.
Haddrath, O. & Baker, A.J. (2012). Multiple nuclear genes and retroposons support vicariance and dispersal of the palaeognaths, and an Early Cretaceous origin of modern birds. Proceedings of the Royal Society B-Biological Sciences, 279, 4617-4625.
Haile, J., Holdaway, R.,Oliver, K., Bunce, M., Gilbert, M. T. P., Nielsen, R., Munch, K., Ho, S. Y. W., Shapiro, B., Willerslev, E., (2007). Ancient DNA chronology within sediment deposits: are palaeobiological reconstructions possilbe and is DNA a leaching factor? . Molecular Biology Evolution, 24, 982-989.
Hartnup, K., Huynen, L., Te Kanawa, R., Shepherd, L.D., Millar, C.D., Lambert, D.M. (2011). Ancient DNA recovers the origins of Maori feather cloaks. Molecular Biology and Evolution, 28, 2741-2750.
Hartnup, K., Huynen, L., Kanawa, R. T., Shepherd, L., Millar, C., Lambert, D. (2009). A molecular study of a rare Maori cloak.
Heupink, T.H., Huynen, L., Lambert, D.M. (2011). Ancient DNA Suggests Dwarf and 'Giant' Emu Are Conspecific. Plos One, 6.
Heupink, T. H., van den Hoff, J., Lambert, D. M. (2012). King penguin population on Macquarie Island recovers ancient DNA diversity after heavy exploitation in historic times. Biology Letters, 8, 586-589.
Heupink, T.H., van Grouw, H., Lambert, D.M. (2014). The mysterious Spotted Green Pigeon and its relation to the Dodo and its kindred. BMC Evolutionary Biology, 14, 136.
Hofreiter, M., Mead, J.I., Martin, P., Poinar, H.N. (2003). Molecular caving. Current Biology, 13, R693-695.
Houde, P., Cooper, A., Leslie, E., Strand, A. E., Montano, G. A. (1997). Phylogeny and Evolution of 12S rDNA in Gruiformes (Aves). Avian Molecular Evolution and Systematics, 121-158.
Houde, P.W. (1988). Paleognathous birds from the early tertiary of the northern hemisphere. Nuttall Ornithological Club, Cambridge.
Hung, C.-M., Lin, R.-C., Chu, J.-H., Yeh, C.-F., Yao, C.-J. & Li, S.-H. (2013). The De Novo Assembly of Mitochondrial Genomes of the Extinct Passenger Pigeon (Ectopistes migratorius) with Next Generation Sequencing. Plos One, 8.
Hung, C.M., Shaner, P.J.L., Zink, R.M., Liu, W.C., Chu, T.C., Huang, W.S. et al. (2014). Drastic population fluctuations explain the rapid extinction of the passenger pigeon. Proceedings of the National Academy of Sciences of the United States of America, 111, 10636-10641.
Huynen, L., Gill, B.J., Millar, C.D., Lambert, D.M. (2010). Ancient DNA reveals extreme egg morphology and nesting behavior in New Zealand's extinct moa. Proceedings of the National Academy of Sciences of the United States of America, 107, 16201-16206.
Huynen, L. & Lambert, D.M. (2015). A Concentrated Hydrochloric Acid-based Method for Complete Recovery of DNA from Bone. Journal of Forensic Sciences, 60, 1553-1557.
Huynen, L., Millar, C.D., Scofield, R.P., Lambert, D.M. (2003). Nuclear DNA sequences detect species limits in ancient moa. Nature, 425, 175-178.
Huynen, L., Suzuki, T., Ogura, T., Watanabe, Y., Millar, C.D., Hofreiter, M. et al. (2014). Reconstruction and in vivo analysis of the extinct tbx5 gene from ancient wingless moa (Aves: Dinornithiformes). BMC Evolutionary Biology, 14.
Huynen, L.L., DM (2014). Complex species status for extinct moa (Aves: Dinornithiformes) from the genus Euryapteryx. Plos One, 9, e90212.
Huynen, L., Lissone, I., Sawyer, S., Lambert, D. (2008). Genetic identification of moa remains recovered from Tiniroto, Gisborne. Journal of the Royal Society of New Zealand, 38, 231-235.
Illera, J.C., Richardson, D.S., Helm, B., Atienza, J.C., Emerson, B.C. (2008). Phylogenetic relationships, biogeography and speciation in the avian genus Saxicola. Molecular Phylogenetics and Evolution, 48, 1145-1154.
Jackson, H., Jones, C.G., Agapow, P.M., Tatayah, V., Groombridge, J.J. (2015). Micro-evolutionary diversification among Indian Ocean parrots: temporal and spatial changes in phylogenetic diversity as a consequence of extinction and invasion. Ibis, 157, 496-510.
Jacomb, C., Holdaway, R.N., Allentoft, M.E., Bunce, M., Oskam, C.L., Walter, R. et al. (2014). High-precision dating and ancient DNA profiling of moa (Aves: Dinornithiformes) eggshell documents a complex feature at Wairau Bar and refines the chronology of New Zealand settlement by Polynesians. Journal of Archaeological Science, 50, 24-30.
Jain, S., Rai, N., Kumar, G., Pruthi, P. A., Thangaraj, K., Bajpai, S., et al. (2017). Ancient DNA reveals late Pleistocene existence of ostriches in Indian sub-continent. Plos One, 12, e0164823.
Johansson, U.S., Pasquet, E., Irestedt, M. (2011). The New Zealand Thrush: An Extinct Oriole. Plos One, 6.
Johnson, J.A. & Dunn, P.O. (2006). Low genetic variation in the heath hen prior to extinction and implications for the conservation of prairie-chicken populations. Conservation Genetics, 7, 37-48.
Johnson, K.P., Clayton, D.H., Dumbacher, J.P., Fleischer, R.C. (2010). The flight of the Passenger Pigeon: Phylogenetics and biogeographic history of an extinct species. Molecular Phylogenetics and Evolution, 57, 455-458.
Kirchman, J.J. (2012). Speciation of Flightless Rails on Islands: A DNA-Based Phylogeny of the Typical Rails of the Pacific. Auk, 129, 56-69.
Kirchman, J.J., Schirtzinger, E.E., Wright, T.F. (2012). Phylogenetic Relationships of the Extinct Carolina Parakeet (Conuropsis Carolinensis) Inferred from DNA Sequence Data. Auk, 129, 197-204.
Kirchman, J.J., Witt, C.C., McGuire, J.A., Graves, G.R. (2010). DNA from a 100-year-old holotype confirms the validity of a potentially extinct hummingbird species. Biology Letters, 6, 112-115.
Kundu, S., Jones, C.G., Prys-Jones, R.P., Groombridge, J.J. (2012). The evolution of the Indian Ocean parrots (Psittaciformes): extinction, adaptive radiation and eustacy. Molecular Phylogenetics and Evolution, 62, 296-305.
Lagerholm, V. K., Sandoval-Castellanos, E., Vaniscotte, A., Potapova, O. R., Tomek, T., et al. (2017). Range shifts or extinction? Ancient DNA and distribution modelling reveal past and future responses to climate warming in cold-adapted birds. Global change biology, 23, 1425-1435.
Lambert, D., Baker, A., Huynen, L., Haddrath, O., Hebert, P. D. N., Millar, C. D. (2005). Is a large-scale DNA-based inventory of ancient life possible? Journal of Heredity, 96, 279-284.
Lambert, D.M., Ritchie, P.A., Millar, C.D., Holland, B., Drummond, A.J., Baroni, C. (2002). Rates of evolution in ancient DNA from Adelie penguins. Science, 295, 2270-2273.
Lambert, D.M., Shepherd, L.D., Huynen, L., Beans-Picon, G., Walter, G.H., Millar, C.D. (2009). The Molecular Ecology of the Extinct New Zealand Huia. Plos One, 4.
Lawrence, H. A., Scofield, R. P., Crockett, D. E., Millar, C. D., Lambert, D. M. (2008). Ancient genetic variation in one of the world's rarest seabirds. Heredity, 101, 543-547.
Loog, L., Thomas, M. G., Barnett R., Allen, R., Skykes, N., Paxinos, P. D., Lebrasseur, O., Dobney, K., Peters, J., Manica, A., Larson, G., Eriksoon, A. (2017). Inferring allele frequency trajectories from ancient DNA indicates that selection on a chicken gene coincided with changes in medieval husbandry practices. Molecular Biology and Evolution, In Press.
Lovette, I.J., Perez-Eman, J.L., Sullivan, J.P., Banks, R.C., Fiorentino, I., Cordoba-Cordoba, S. et al. (2010). A comprehensive multilocus phylogeny for the wood-warblers and a revised classification of the Parulidae (Aves). Molecular Phylogenetics and Evolution, 57, 753-770.
Marki, P.Z., Jønsson, K. A., Irestedt, M., Nguyen, J. M. T., Rahbek, C., Fjeldså, J. (2016). Supermatrix phylogeny and biogeography of the Australasian Meliphagides radiation (Aves: Passeriformes). Molecular Phylogenetics and Evolution, 107, 516-529.
McCallum, J., Hall, S., Lissone, I., Anderson, J., Huynen, L., Lambert, D.M. (2013). Highly Informative Ancient DNA 'Snippets' for New Zealand Moa. Plos One, 8.
Millar, C.D., Dodd, A., Anderson, J., Gibb, G. C., Ritchie, P. A., Baroni, C., Woodhams, M. D., Hendy, M. D., Lambert, D. M. (2008). Mutation and evolutionary rates in Adelie penguins from the antarctic. Plos Genetics, 4, e1000209.
Mitchell, K. J., Wood, J. R., Scofield, R. P., Llamas, B., Cooper, A. (2014). Ancient mitochondrial genome reveals unsuspected taxonomic affinity of the extinct Chatam duck (Pachyanas chathamica) and resolves divergence times for New Zealand and sub-Antarctic brown teals.Molecular Phylogenetics and Evolution, 70, 420-428.
Mitchell, K.J., Llamas, B., Soubrier, J., Rawlence, N. J., Worthy, T. H., Wood, J., Lee, M. S. Y., Cooper, A. (2014). Ancient DNA reveals elephant birds and kiwi are sister taxa and clarifies ratite bird evolution. Science, 344, 898-900.
Mitchell, K.J., Wood, J.R., Scofield, R.P., Llamas, B., Cooper, A. (2014). Ancient mitochondrial genome reveals unsuspected taxonomic affinity of the extinct Chatham duck (Pachyanas chathamica) and resolves divergence times for New Zealand and sub-Antarctic brown teals. Molecular Phylogenetics and Evolution, 70, 420-428.
Mitchell, K.J., Wood, J. R., Llamas, B., McLenachan, P. A., Kardailsky, O., Scofield, R. P., Worthy, T. H., Cooper, A. (2016). Ancient mitochondrial genomes clarify the evolutionary history of New Zealand's enigmatic acanthisittid wrens. Molecular Phylogenetics and Evolution, 102, 295-304.
Moum, T., Arnason, U., Arnason, E. (2002). Mitochondrial DNA sequence evolution and phylogeny of the Atlantic Alcidae, including the extinct Great Auk (Pinguinus impennis). Molecular Biology and Evolution, 19, 1434, 1439.
Murphy, S.A., Flux, I. A., Double, M. C. (2006). Recent evolutionary history of New Zealand’s North and South Island Kokako (Callaeas cinerea) inferred from mitochondrial DNA sequences.. Emu, 106, 41-48.
Murray, D. C., Haile, J., Dortch, J., White, N. E., Haouchar, D., Bellgard, M. I., Allcock, R. J., Prideaux, G. J., Bunce, M. (2013). Scrapheap challenge: a novel bulk-bone metabarcoding method to investigate ancient DNA in faunal assemblages. Scientific reports, 3, 3371.
Nylander, J.A.A., Olsson, U., Alstrom, P., Sanmartin, I. (2008). Accounting for phylogenetic uncertainty in biogeography: A Bayesian approach to dispersal-vicariance analysis of the thrushes (Aves : Turdus). Systematic Biology, 57, 257-268.
Oskam, C.L., Allentoft, M.E., Walter, R., Scofield, R.P., Haile, J., Holdaway, R.N. et al. (2012). Ancient DNA analyses of early archaeological sites in New Zealand reveal extreme exploitation of moa (Aves: Dinornithiformes) at all life stages. Quaternary Science Reviews, 52, 41-48.
Oskam, C.L., Haile, J., McLay, E., Rigby, P., Allentoft, M.E., Olsen, M.E. et al. (2010). Fossil avian eggshell preserves ancient DNA. Proceedings of the Royal Society B-Biological Sciences, 277, 1991-2000.
Oskam, C.L., Jacomb, C., Allentoft, M.E., Walter, R., Scofield, R.P., Haile, J. et al. (2011). Molecular and morphological analyses of avian eggshell excavated from a late thirteenth century earth oven. Journal of Archaeological Science, 38, 2589-2595.
Parks, M., Subramanian, S., Baroni, C., Salvatore, M.C., Zhang, G., Millar, C.D. et al. (2015). Ancient population genomics and the study of evolution. Philosophical Transactions of the Royal Society B, 370.
Patel, S., Waugh, J., Millar, C. D., Lambert, D. M. (2010). Conserved primers for DNA barcoding historical and modern samples from New Zealand and Antarctic Birds. Molecular Ecology Resources, 10, 431-438.
Paton, T., Haddrath, O., Baker, A. (2002). Complete mitochondrial DNA genome sequences show that modern birds are not descended from transitional shorebirds. Proceedings of the Royal Society London B, 269, 839-846.
Paxinos, E.E., James, H.F., Olson, S.L., Sorenson, M.D., Jackson, J., Fleischer, R.C. (2002). mtDNA from fossils reveals a radiation of Hawaiian geese recently derived from the Canada goose (Brantacanadensis). Proceedings of the National Academy of Science U S A, 99, 1399-1404.
Pertoldi, C., Negro, J.J., Munoz, J., Barbanera, F., Garrido, H. (2006). Introduction or reintroduction? Last resorts for the latest bird to become extinct in Europe, the Andalusian hemipode Turnix sylvatica sylvatica. Biodiversity and Conservation, 15, 3895-3908.
Phillips, M.J., Gibb, G.C., Crimp, E.A. & Penny, D. (2010). Tinamous and Moa Flock Together: Mitochondrial Genome Sequence Analysis Reveals Independent Losses of Flight among Ratites. Systematic Biology, 59, 90-107.
Podsiadlowski, L., Gamauf, A., Topfer, T. (2016). Revising the phylogenetic position of the extinct Mascarene Parrot Mascarinus mascarin (Linnaeus 1771) (Aves: Psittaciformes: Psittacidae). Molecular Phylogenetics and Evolution, 107, 499-502.
Powell, A.F.L.A., Barker, F.K., Lanyon, S.M. (2008). A Complete Species-Level Phylogeny of the Grackles (Quiscalus Spp.), Including the Extinct Slender-Billed Grackle, Inferred from Mitochondrial DNA. Condor, 110, 718-728.
Ramirez, O., Illera, J. C., Rando, J. C., Gonzalez-Soli, J., Alcover, J. A., Lalueza-Fox, C. (2010). Ancient DNA of the extinct Lava Shearwater (Puffinus olsoni) from the Canary Islands reveals incipient differentiation within the P. puffinus complex. PLoS One, 5, 12.
Rawlence, N.J., Perry, G.L.W., Smith, I.W.G., Scofield, R.P., Tennyson, A.J.D., Matisoo-Smith, E.A. et al. (2015). Radiocarbon-dating and ancient DNA reveal rapid replacement of extinct prehistoric penguins. Quaternary Science Reviews, 112, 59-65.
Rawlence, N.J., Wood, J.R., Armstrong, K.N., Cooper, A. (2009). DNA content and distribution in ancient feathers and potential to reconstruct the plumage of extinct avian taxa. Proceedings of the Royal Society B-Biological Sciences, 276, 3395-3402.
Rawlence, N.J., Wood, J. R., Bocherens, H., Rogers, K. M. (2016). Dietary interpretations for extinct megafauna using coprolites, intestinal contents and stable isotopes: complimentary or contradictory? Quaternary Science Reviews, 142.
Rawlence, N.J, Metcalf, J. L., Wood, J. R., Worthy, T. H., Austin, J. J., Cooper, A. (2012). The effect of climate and environmental change on the megafaunal moa of New Zealand in the absence of humans. Quaternary Science Reviews, 50, 141-153.
Ritchie, P.A., Millar, C.D., Gibb, G.C., Baroni, C., Lambert, D.M. (2004). Ancient DNA enables timing of the Pleistocene origin and Holocene expansion of two Adelie penguin lineages in Antarctica. Molecular Biology and Evolution, 21, 240-248.
Saitoh, T., Cibois, A., Kobayashi, S., Pasquet, E., Thibault, J.C. (2012). The complex systematics of the Acrocephalus of the Mariana Islands, western Pacific. Emu, 112, 343-349.
Scofield, R.P., Mitchell, K. J., Wood, J. R., De Pietri, V. L., Jarvie, S., Llamas, B., Cooper, A. (2017). The origin and phylogetic relationships of the New Zealand ravens. Molecular Phylogenetics and Evolution, 106, 136-143.
Seabrook-Davison, M., Huynen, L., Lambert, D.M. & Brunton, D.H. (2009). Ancient DNA Resolves Identity and Phylogeny of New Zealand's Extinct and Living Quail (Coturnix sp.). Plos One, 4.
Shapiro, B., Sibthorpe, D., Rambaut, A., Austin, J., Wragg, G. M., Bininda-Emonds, O. R. P., Lee, P. L. M., Cooper, A. (2002). Flight of the Dodo. Science, 295, 1683.
Sheldon, F.H., Whittingham, L.A., Moyle, R.G., Slikas, B., Winkler, D.W. (2005). Phylogeny of swallows (Aves : Hirundinidae) estimated from nuclear and mitochondrial DNA sequences. Molecular Phylogenetics and Evolution, 35, 254-270.
Shepherd, L., Worthy, T. H., Tennyson, A. J. D., Scofield, R. P., Ramstad, K. M., Lambert, D. M. (2012). Ancient DNA analyses reveal constrasting phylogeographic patterns amongst kiwi (Apteryx spp.) and a recently extinct lineage of spotted kiwi. Plos One.
Shepherd, L.D. & Lambert, D.M. (2007). The relationships and origins of the New Zealand wattlebirds (Passeriformes, Callaeatidae) from DNA sequence analyses. Molecular Phylogenetics and Evolution, 43, 480-492.
Shepherd, L.D. & Lambert, D.M. (2008). Ancient DNA and conservation: lessons from the endangered kiwi of New Zealand. Molecular Ecology, 17, 2174-2184.
Shepherd, L.D., Millar, C.D., Ballard, G., Ainley, D.G., Wilson, P.R., Haynes, G.D. et al. (2005). Microevolution and mega-icebergs in the Antarctic. Proceedings of the National Academy of Sciences of the United States of America, 102, 16717-16722.
Slikas, B., Jones, I.B., Derrickson, S.R., Fleischer, R.C. (2000). Phylogenetic relationships of Micronesian white-eyes based on mitochondrial sequence data. Auk, 117, 355-365.
Smith, J.V., Braun, E.L., Kimball, R.T. (2013). Ratite Nonmonophyly: Independent Evidence from 40 Novel Loci. Systematic Biology, 62, 35-49.
Soares, A.E., Novak, B.J., Haile, J., Heupink, T.H., Fjeldsa, J., Gilbert, M.T. et al. (2016). Complete mitochondrial genomes of living and extinct pigeons revise the timing of the columbiform radiation. BMC Evolutionary Biology, 16, 230.
Sorenson, M.D., Cooper, A., Paxinos, E.E., Quinn, T.W., James, H.F., Olson, S.L. et al. (1999). Relationships of the extinct moa-nalos, flightless Hawaiian waterfowl, based on ancient DNA. Proceedings of the Royal Society B-Biological Sciences, 266, 2187-2193.
Speller, C.F., Kemp, B.M., Wyatt, S.D., Monroe, C., Lipe, W.D., Arndt, U.M. et al. (2010). Ancient mitochondrial DNA analysis reveals complexity of indigenous North American turkey domestication. Proceedings of the National Academy of Science U S A, 107, 2807-2812.
Steeves, T.E., Holdaway, R.N., Hale, M.L., McLay, E., McAllan, I.A.W., Christian, M. et al. (2010). Merging ancient and modern DNA: extinct seabird taxon rediscovered in the North Tasman Sea. Biology Letters, 6, 94-97.
Storey, A.A., Athens, J.S., Bryant, D., Carson, M., Emery, K., deFrance, S. et al. (2012). Investigating the Global Dispersal of Chickens in Prehistory Using Ancient Mitochondrial DNA Signatures. Plos One, 7.
Storey, A.A., Ramírez, J.M., Quiroz, D., Burley, D.V., Addison, D.J., Walter, R. et al. (2007). Radiocarbon and DNA evidence for a pre-Columbian introduction of Polynesian chickens to Chile. Proceedings of the National Academy of Sciences, 104, 10335-10339.
Storey, A.A., Spriggs, M., Bedford, S., Hawkins, S.C., Robins, J.H., Huynen, L. et al. (2010). Mitochondrial DNA from 3000-year old chickens at the Teouma site, Vanuatu. Journal of Archaeological Science, 37, 2459-2468.
Subramanian, S., Denver, D. R., Millar, C. D., Heupink, T., Aschrafi, A., Emslie, S. D., Baroni, C., Lambert, D. M. (2009). High mitotic evolutionary rates and time dependency. Trends in genetics : TIG, 25, 482-486.
Tebbutt, S.J. & Simons, C. (2002). Gene sequences from New Zealand's extinct huia. Journal of the Royal Society of New Zealand, 32, 327-335.
Tennyson, A. J.D., Cooper, J. H., Shepherd, L. D. (2015). A new species of extinct Pterodroma petrel (Procellariiformes: Procellariidae) from the Chatham Islands, New Zealand. British Ornithologists' Club, 135, 267-277.
Tennyson, A. J. D., Shepherd, L. D. (2017). DNA reveals the relationships of the extinct Scarlett's Shearwater Puffinus spelaeus (Procellariiformes: Procellariidae). Journal of Ornithology, 158, 379-384.
Thomas, J. E., Carvalho, G. R., Haile, J., Martin, M. D., Samaniego Castruita, J. A., et al. (2017). An 'Aukward' Tale: A genetic approach to discover the whereabouts of the last Great Auks. Genes, 8, 164.
Thomson, V.A., Lebrasseur, O., Austin, J.J., Hunt, T.L., Burney, D.A., Denham, T. et al. (2014). Using ancient DNA to study the origins and dispersal of ancestral Polynesian chickens across the Pacific. Proceedings of the National Academy of Sciences of the United States of America, 111, 4826-4831.
Trewick, S.A. (1997). Flightlessness and phylogeny amongst endemic rails (Aves: Rallidae) of the New Zealand region. Philosophical Transactions of the Royal Society B, 352, 429-446.
Warren, B.H., Bermingham, E., Prys-Jones, R.P., Thebaud, C. (2006). Immigration, species radiation and extinction in a highly diverse songbird lineage: white-eyes on Indian Ocean islands. Molecular Ecology, 15, 3769-3786.
Waters, J.M., Fraser, C. I., Maxwell, J. J., Rawlence, N. J. (2017). Did interaction between human pressure and Little Ice Age drive biological turnover in New Zealand? Journal of Biogeography In Press.
Welch, A. J., Wiley, A. E., James, H. F., Ostrom, P. H., Stafford, T. W. Jr., Fleischer, R. C. (2012). Ancient DNA reveals genetic stability despite demographic decline: 3,000 years of population history in the endemic Hawaiin petrel. Molecular Biology and Evolution, 29, 3729-2740.
Welch, A.J., Olson, S.L., Fleischer, R.C. (2014). Phylogenetic relationships of the extinct St Helena petrel, Pterodroma rupinarum Olson, 1975 (Procellariiformes: Procellariidae), based on ancient DNA. Zoological Journal of the Linnean Society, 170, 494-505.
Willerslev, E., Hansen, A.J., Binladen, J., Brand, T.B., Gilbert, M.T.P., Shapiro, B. et al. (2003). Diverse plant and animal genetic records from Holocene and Pleistocene sediments. Science, 300, 791-795.
Wood, J.R., Rawlence, N.J., Rogers, G.M., Austin, J.J., Worthy, T.H., Cooper, A. (2008). Coprolite deposits reveal the diet and ecology of the extinct New Zealand megaherbivore moa (Aves, Dinornithiformes). Quaternary Science Reviews, 27, 2593-2602.
Wood, J.R., Wilmshurst, J. M., Worthy, T. H., Holzapfel, A. S., Cooper, A. (2012a). A lost link between a flightless parrot and a parasitic plant and the potential role of coprolites in conservation paleobiology. Conservation Biology, 26, 1091-1099.
Wood, J.R., Mitchell, K. J., Scofield, R. P., De Pietri, V. L., Rawlence, N. J., Cooper, A. (2016). Phylogenetic relationships and terrestrial adaptations of the extinct laughing owl, Sceloglaux albifacies (Aves: Strigidae). Zoological Journal of the Linnean Society.
Wood, J.R., Mitchell, K. J., Scofield, R. P., Tennyson, A., Fidler, A. E., Wilmshurst, J. M., Llamas, B., Cooper, A. (2014). An extinct nestorid parrot (Aves, Psittaciformes, Nestoridae) from the Chatham Islands, New Zealand. Zoological Journal of the Linnean Society.
Wood, J.R., Wilmshurst., J. M., Rawlence, N. J., Bonner, K. I., Worthy, T. H., Kinsella, J. M., Cooper, A. (2013a). A megafauna's microfauna: gastrointestinal parasites of New Zealand's extinct moa (Aves: Dinornithiformes). Plos One, 8.
Wood, J.R., Wilmshurst, J. M., Richardson, S. J., Rawlence, N. J., Wagstaff, S. J., Worthy, T. H., Cooper, A. (2013b). Resolving lost herbivore community structure using coprolites of four sympatric moa species (Aves: Dinornithiformes). Proceedings of the National Academy of Sciences of the United States of America, 110, 16910-16915.
Wood, J.R., Wilmshurst, J. M., Wagstaff, S. J., Worthy, T. H., Rawlence, N. J, Cooper, A. (2012b). High-resolution coproecology: using coprolites to reconstruct habits and habitats of New Zealand's extinct upland moa (Megalapteryx didinus). Plos One.
Wood, J.R., Wilmshurst, J. M., Worthy, T. H., Cooper, A. (2012c). First coprolite evidence for the diet of Anomalopteryx didiformis, an extinct forest ratite from New Zealand. New Zealand Journal of Ecology, 36, 164-170.
Xiang, H., Gao, J.Q., Yu, B.Q., Zhou, H., Cai, D.W., Zhang, Y.W. et al. (2014). Early Holocene chicken domestication in northern China. Proceedings of the National Academy of Sciences of the United States of America, 111, 17564-17569.
Yonezawa, T., Segawa, T., Mori, H., Campos, P. F., Hongoh, Y., Endo, H., Akiyoshi, A., Kohno, N., Nishida, S., Wu, J., Jin, H., Adachi, J., Kishino H., Kurokawa, K., Nogi, Y., Tanabe, H., Mukoyama, H., Yoshida, K., Rasoamiaramanana, A., Yamagishi, S., Hayashi, Y., Yoshida, A., Koike, H., Akishinonomiya, F., Willerslev, E., Hasegawa, M. (2016). Phylogenomics and morphology of extinct palaeognaths …
Zink, R.M., Dittmann, D.L., Klicka, J., Blackwell-Rago, R.C. (1999). Evolutionary patterns of morphometrics, allozymes, and mitochondrial DNA in thrashers (genus Toxostoma). Auk, 116, 1021-1038.
Zuccon, D. & Ericson, P.G.P. (2012). Molecular and morphological evidences place the extinct New Zealand endemic Turnagra capensis in the Oriolidae. Molecular Phylogenetics and Evolution, 62, 414-426.
Zuccon, D., Pasquet, E., Ericson, P.G.P. (2008). Phylogenetic relationships among Palearctic-Oriental starlings and mynas (genera Sturnus and Acridotheres : Sturnidae). Zoologica Scripta, 37, 469-481.
Zuccon, D., Prys-Jones, R., Rasmussen, P.C., Ericson, P.G.P. (2012). The phylogenetic relationships and generic limits of finches (Fringillidae). Molecular Phylogenetics and Evolution, 62, 581-596.
